# Supplementary material
Source: PubMed Central journal article supplement (PMC3549462)
Supplement: NIHMS429213-supplement-1.pdf [file NIHMS429213-supplement-1.pdf]

## INCLUSION CRITERIA

1. In good general health.
2. Age 18 – 55 years.
3. Normal fasting glucose.
4. Stable weight with BMI (25-45).
5. Stable medication use for the preceding month.
6. BP < 150/90.
7. Negative pregnancy test (\*HCG), if female and of childbearing potential.
8. Practicing, and willing to continue to practice appropriate contraception throughout the study if a female of childbearing potential.
9. Signed Informed Consent.

## EXCLUSION CRITERIA

1. Serious medical illness.
2. Pregnancy.
3. Post-menopausal.
4. Tobacco use within the past 6 months.
5. Prior or current treatment with a thiazolidinedione.
6. Known or suspected abuse of alcohol or narcotics.
7. General history of non-compliance with medication.
8. Mental incapacity, unwillingness or language barriers precluding adequate understanding or cooperation.
9. Investigational drug in the past 30 days.
10. Use of systemic corticosteroids.
11. Known or suspected allergy to Rosiglitazone or any component of the preparation
