# Supplementary material
Source: PubMed Central journal article supplement (PMC3549462)

# CONSORT Flow Diagram

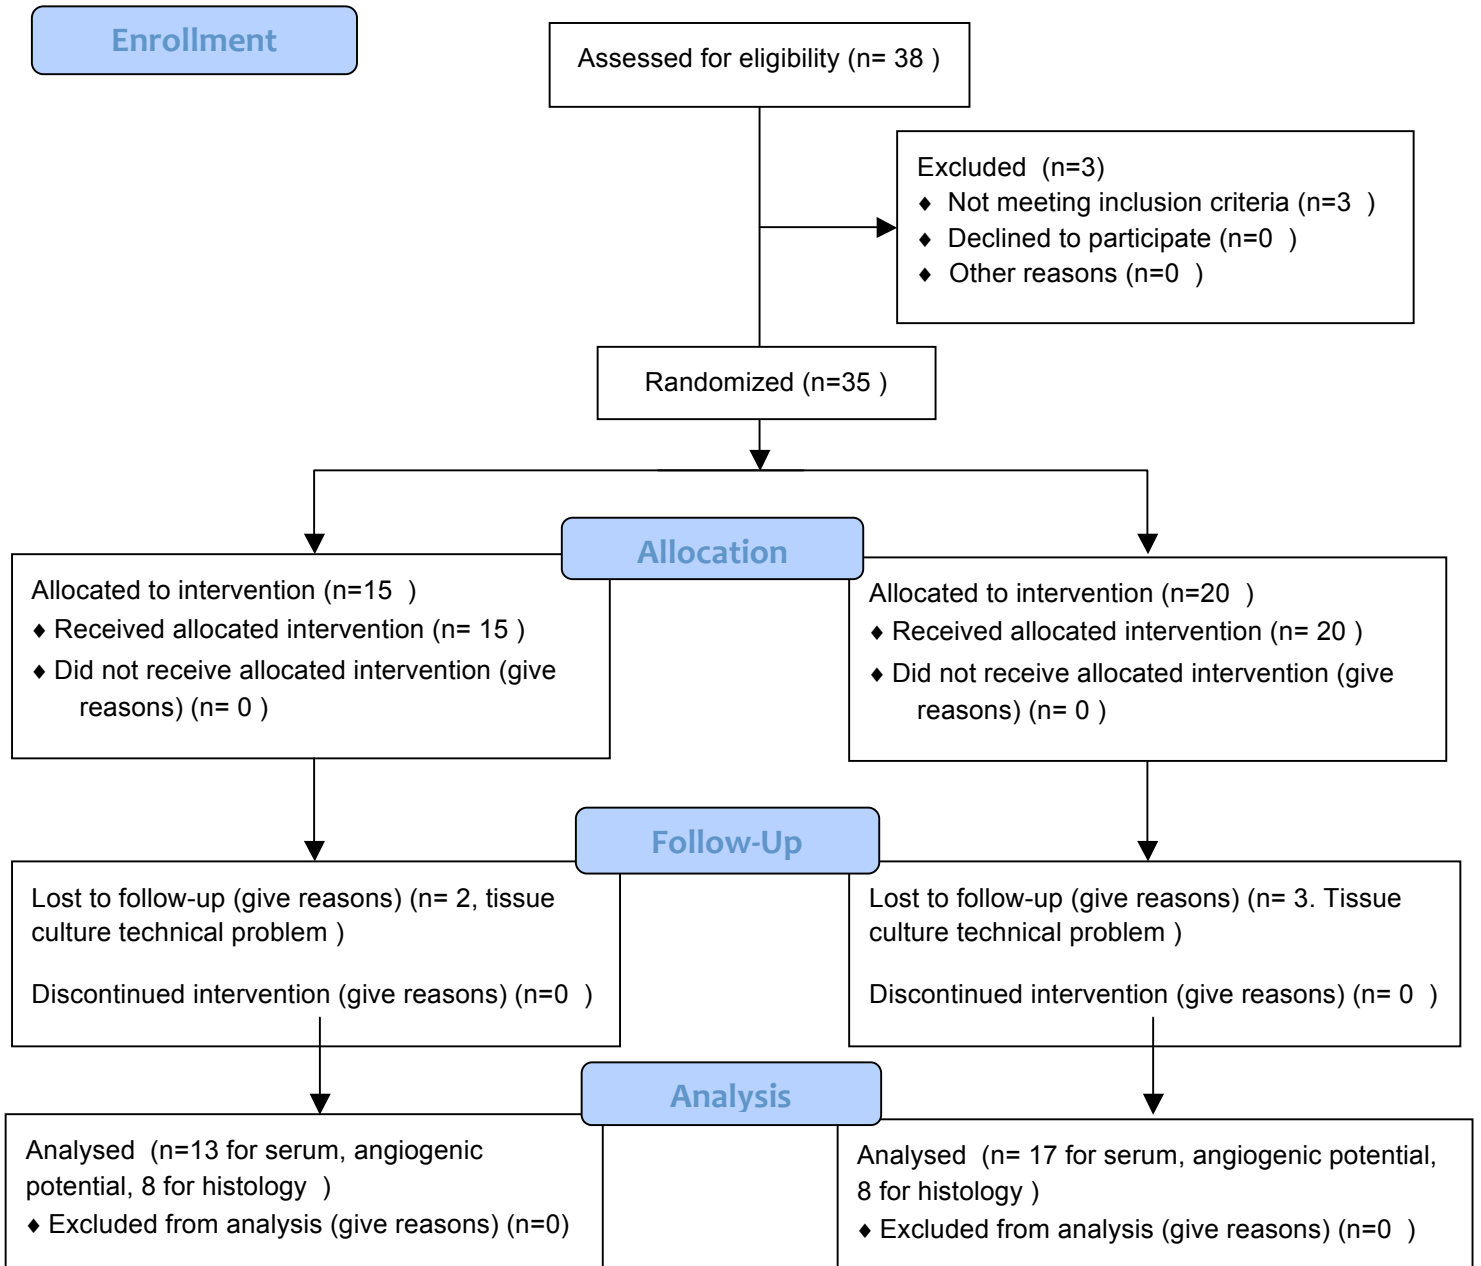

Supplement: NIHMS429213-supplement-2.pdf [file NIHMS429213-supplement-2.pdf]
